## 16 Abstract

17 *Background.* In 2020, people around the world were challenged by the outbreak of the COVID-19  
18 pandemic. Countries responded with various restrictions, including lockdowns and stay-at-home orders,  
19 in an attempt to prevent the spread of the disease. Citizens were thus subjected to unprecedented  
20 uncertainty and stress. Prolonged exposure to such conditions may impact human health and well-  
21 being. One of the core aspects of proper physiological functioning is sleep. This prospective longitudinal  
22 study aims to investigate sleep quality and its relationship to chronotype over a year-long period from  
23 September 2020.

24 *Methods and findings.* Our year-long longitudinal prospective study focused on an employee cohort  
25 (N=54) at the Research Centre for Toxic Compounds in the Environment (RECETOX) of Masaryk  
26 University in the Czech Republic. During the first half of this period, three lockdowns with a cumulative  
27 duration of 100 days were imposed. During the second half of this period, the imposed restrictions were  
28 relaxed. Individuals were measured quarterly, i.e. at five time points. Sleep quality was measured using  
29 the Pittsburgh Sleep Quality Index (PSQI) while chronotype was established using the Reduced  
30 Morningness-Eveningness Questionnaire (rMEQ). We also used Perceived Stress Scale (PSS-14), Beck  
31 Depression Inventory (BDI-II), and General Anxiety Disorder-7 (GAD-7) to address potential confounders.  
32 The response rates of valid measurements across time points ranged from 87.04 % to 61.11 %. Our  
33 results show that sleep quality significantly worsened across the year for the evening chronotype but  
34 improved for the neutral and early chronotypes. Overall, over the year the incidence of poor sleep  
35 decreased by 16.13 % with 95% CI [-6.10%; 37.16%]. We did not find any significant sex differences in  
36 sleep quality. Perceived stress, symptoms of anxiety and depression were positively significantly  
37 associated with sleep problems in all measurements except in June. This study is limited by the small

38 sample, decreasing number of individuals in chronotype categories and the lack of information on  
39 napping behavior.

40 *Conclusion.* These findings shed new light on the long-term influence of pandemic-related restrictions on  
41 individuals and particularly on the potentially more vulnerable evening chronotypes.

## 42 Introduction

43 The pandemic outbreak of the coronavirus disease 2019 (COVID-19) resulted in an unprecedented  
44 challenge for societies around the world. The stressful atmosphere of uncertainty and restrictive  
45 governmental measures alone had influenced the psychophysiological functioning of the general  
46 population, as evidenced by a large number of publications [1–5]. One essential psychophysiological  
47 process which ensures overall health and regulates many functions of the organism is sleep [6]. The quality  
48 of sleep can be negatively affected by stress, resulting in sleep dysfunctions and the subsequent  
49 worsening of physical, psychological and cognitive functioning or increasing levels of perceived stress [7].  
50 Therefore, understanding the influence of pandemics and related events on sleep quality in the general  
51 population is a crucial topic within the context of public health in general.

52 Existing research recognizes an association between pandemics and sleep problems. Several meta-  
53 analyses and systematic reviews summarized the evidence and found that the negative effect of COVID-  
54 19-related lockdowns on sleep quality was significant [8–12], but not uniform. Some individuals may  
55 have experienced sleep quality improvement [8,9]. This disparity might be caused by various factors. For  
56 example, social jetlag reduction and relaxation of work-related sleep restrictions [8], individual  
57 characteristics such as being an early chronotype [8], psychological factors, perception of stress, lifestyle  
58 factors [8–11], or geographical and socioeconomic factors [8,11]. The impact of sex and age seems to be  
59 complicated. Some studies found that younger individuals have better sleep quality during lockdown

60 [8,9], but not all [8]. Regarding sex differences, studies suggest that women generally suffer from  
61 increased sleep [8,9], but, during confinement at home, sleep quality improved in women and worsened  
62 in men [12]. On the whole, differences in sleep quality changes during lockdown could be explained by a  
63 complex net of individual socio-psychological factors [8].

64 Most previously published studies were either cross-sectional [11,13,14] or short-term longitudinal  
65 [13,15–18]. Such designs are not necessarily well-suited to showing the long-term consequences of  
66 pandemics and related restrictions. Moreover, studies usually focused only on a single lockdown period  
67 [13,15–18]. Prospective studies which would include more than one lockdown period while also  
68 encompassing some time after the lockdown were lacking. Such studies would improve our  
69 understanding of the impact of repetitive measures employed by governments.

70 As the lockdown imposed on the inhabitants of the Czech Republic was not a continuous event, this  
71 study focuses on a year-long period from 1<sup>st</sup> September 2020 to 31<sup>st</sup> October 2021 in order to capture a  
72 representative image of both lockdown and post-lockdown phases. The epidemic trend of COVID-19 is  
73 shown in Fig. 1. From October 2020 to April 2021, three waves of COVID-19 prevalence emerged. The  
74 highest points were on 27<sup>th</sup> October (1,200.01 cases per million), 10<sup>th</sup> January 2021 (1,207.96 cases per  
75 million), and 5<sup>th</sup> March 2021 (1,148.53 cases per million). Restrictions on free movement were employed  
76 from the 21<sup>st</sup> October 2020 to the 12<sup>th</sup> of April 2021 with stay-at-home policy phases from the 21<sup>st</sup> of  
77 October 2020 to the 3<sup>rd</sup> of November 2020, the 23<sup>rd</sup> of December 2020 to the 14<sup>th</sup> of February 2021, and  
78 8<sup>th</sup> March 2021 to 11<sup>th</sup> April 2021. Data were obtained from Our world in data [19].

79

80 *Figure 1.: The national pandemic trend of COVID-19 prevalence and lockdown measures in Czech Republic from 1<sup>st</sup> September*  
81 *2020 to 31<sup>st</sup> October 2021. The values are a 7-day rolling average of new cases per million inhabitants. Dashed lines represent*  
82 *the sending of the questionnaires.*

83 This study aims to investigate the course of sleep quality and its relationship with chronotype. We used  
84 prospective longitudinal design in a year-long study which included three lockdown periods during the  
85 course of six months, and an equally long period of relaxed restrictions. We also examined cofactors  
86 such as perceived stress, and symptoms of depression or anxiety.

## 87 Methods

### 88 Subjects and study design

89 The study was approved by the Masaryk University (MU) Ethics Committee. The cohort consists of  
90 volunteers from the employees of the Research Center for Toxic Compounds in the Environment  
91 (RECETOX) at MU. All RECETOX employees were invited to the study via email in September 2020,  
92 before the restriction measures were tightened. The informed consent document was delivered by e-  
93 mail or in person. 56 people signed the informed consent document (either physically or electronically),  
94 and joined the study. Some characteristics of the population are in supplementary material S1 Table. We  
95 sent an e-mail to those who joined the study with links for questionnaires at the beginning of the study  
96 (October 2020) and then quarterly (December 2020, March 2021, June 2021, and September 2021),  
97 resulting in 5 time points of data collection. Some of these time points correspond to the beginning  
98 (October 2020, March 2021) and the end (December 2020, April 2021) of the strictest governmental  
99 restrictions in the Czech Republic. The course of national pandemic trends of COVID-19 disease and the  
100 timing of lockdown measures are in Fig. 1. The questionnaires were administered via Microsoft Office  
101 Forms (<https://forms.office.com/>).

## 102 Measurements

### 103 Demographic data and COVID-19 positivity

104 We collected information on sex, age, nationality, number of children, and work position. In September  
105 2020, December 2020, and April 2021, we asked participants if they had been diagnosed or were  
106 suspected of undergoing COVID-19 disease.

### 107 Chronotype

108 The morningness and eveningness of individuals were assessed using the Czech and English versions of  
109 the Reduced Morningness-Eveningness Questionnaire (rMEQ). It is a shorter 5-item version of the  
110 widely used Morningness-Eveningness Questionnaire. Cut-off scores are arbitrary with score ranges of  
111 4–11 for the evening type, 12–17 for the neutral type, and 18–25 for the morning type. Evening types  
112 stay up later in the night and wake up later in the morning, morning types, on the other hand, go to  
113 sleep earlier in the evening and get up early in the morning. Psychometric parameters of the Czech  
114 rMEQ version were reported by Skočovský [20]. The appropriateness of arbitrary cut-off scores  
115 regarding the distribution of chronotypes in the population is discussed in several other studies [21,22].

### 116 Sleep quality

117 To evaluate sleep quality, we used the Czech and English versions of the Pittsburgh Sleep Quality Index  
118 (PSQI). The instrument was developed by Buysse et al. [23] and is currently the most commonly used  
119 measure in clinical and research settings [24]. It consists of 19 self-rated questions from which 7  
120 components (subjective sleep quality, sleep latency, sleep duration, habitual sleep efficiency, sleep  
121 disturbances, use of sleep medication, daytime dysfunction) and global PSQI score can be calculated.  
122 PSQI also discriminates between good and poor sleepers using a cut-off score >5 of the global PSQI score

123 [25]. The psychometric parameters of the Czech PSQI in a healthy population were recently reported  
124 [26].

## 125 Cofactors on emotional level

126 The RESTRESS study investigated several factors that may interfere with the quality of sleep, namely  
127 perceived stress, symptoms of depression, and anxiety.

128 Perceived stress was measured using the Czech and English versions of the Perceived Stress Scale (PSS-  
129 14). The scale consists of 14 items and was developed by Cohen et al. [27] for assessment of perceived  
130 unpredictability, uncontrollability and overload of respondents. The psychometric parameters of the  
131 English [28] and Czech version were previously reported [29].

132 Symptoms of depression were measured using the Czech and English versions of the Beck Depression  
133 Inventory (BDI-II). This 21-item inventory was developed by Beck et al. [30] and shows good  
134 psychometric parameters [31,32].

135 General anxiety symptoms were evaluated by the 7-item Generalized Anxiety Scale. Spitzer et al. [33] for  
136 brief clinical measurement of anxiety disorder. The psychometric parameters were previously tested in  
137 another studies [34,35].

138

## 139 Statistical analysis

140 Subjects with complete data from the demographic questionnaire and at least one data point in rMEQ  
141 and PSQI were included in the analysis. Data analysis was performed using statistical software R version  
142 4.1.2 [36]. As a first step of the analysis, descriptive statistics for all variables across all time points were  
143 calculated and basic relationships between variables were explored. As part of the exploratory analysis,  
144 subjects with complete and incomplete data across time points were compared to identify potential

145 differences. R library rmcrr [37] was used to determine the repeated measures correlation of variables  
146 over time. Next, R package lmerTest [38] was used for repeated measures ANOVA and package nlme  
147 [39] for follow-up comparisons. For both rMEQ and PSQI, basic psychometric properties and correlations  
148 across time were assessed to ensure their reliability. Effect sizes were interpreted using Gignac and  
149 Szodorai [40] guideline. Dominant chronotype was calculated for all subjects using mean rMEQ score  
150 throughout all time points and chronotype was used in the further analysis as a time-stable variable. To  
151 test the relationship between sleep quality and chronotype across time, a linear mixed effects model  
152 (LMM) with random intercept was fitted using lmerTest R library [38]. The dependent variable was set to  
153 be the PSQI score, with time point, rMEQ category, and their interaction as covariates.

154 To evaluate the representativeness of our sample, a basic comparison was performed with data  
155 obtained from the RECETOX human resources department. Expected and observed frequencies for sex,  
156 age group, and job category were compared using Pearson's chi-squared test.

## 157 Results

### 158 Participants

159 The analyzed sample consisted of 54 individuals (29 female) with a mean age of 37.6 ( $SD = 8.05$ ) years  
160 who responded in at least one time point. The majority of the sample were Czechs (34 individuals, 62.96  
161 %), 4 individuals were Slovaks (7.41 %), and 11 individuals were from 9 other countries (details in S2  
162 Table). There were 29 participants (53.70 %) with at least one child (details in S2 Table). 25 individuals  
163 are complete cases that responded to every time point, and the other 29 individuals responded to at  
164 least one questionnaire. The response rates are in supplementary material S3 Table. Complete and  
165 incomplete cases did not differ in demographic parameters (details in S4 Table). Compared to the entire  
166 population of RECETOX employees, our sample has similar distribution of sex categories, age categories,



167 and research positions (23 individuals, 47.92 %). On the other hand, academic positions (14 individuals,  
168 29.17 %) are overrepresented and administrative positions (11 participants, 22.92 %) are  
169 underrepresented (details in S1 Table).

170 The predominant chronotype was the neutral chronotype (27 individuals, 50.00 %), the second was the  
171 morning chronotype (19 individuals, 35.19 %), and the least represented was the evening chronotype (8  
172 individuals, 14.81 %; details in S5 Table). Individual changes in the chronotype category are visualized in  
173 Fig. 2. At the beginning of the study, 55.32 % of respondents had poor sleep according to the PSQI  
174 criteria. The number of poor sleepers was lowered through the study, resulting in 41.18 % of poor  
175 sleepers (Fig. 3; details in S5 Table). Based on McNemar's test on paired proportions, the estimated  
176 difference between the proportion of people with poor sleep at the end of the study and at the  
177 beginning of the study is a reduction of 16.13%, 95%CI [-6.10%; 37.16%]. The chi-squared test did not  
178 show significant differences in sleep quality between the complete and missing cases (see S4 Table). The  
179 majority of the sample (41 individuals, 80.39 %) had not suspected nor confirmed SARS-CoV-2 infection  
180 during the study. Only 2 individuals (3.92 %) had confirmed, and 8 individuals (15.69 %) were suspected  
181 of SARS-CoV-2 infection during the study (see S7 Table).

182

183 *Figure 2.: Individual changes in chronotype categories (measured by rMEQ) over the course of the study.*

184

185 *Figure 3.: Good and poor sleepers' ratio (according to PSQI criteria) over the course of the study.*

186 Perceived stress was increasing from October ( $M = 24.50$ ,  $SD = 7.04$ ) to March 2021 ( $M = 27.53$ ,  $SD =$   
187  $9.05$ ), followed by decrease in July 2021 ( $M = 21.74$ ,  $SD = 8.92$ ) and slight increase in October. Symptoms  
188 of anxiety had similar course. Mean values were increasing from October ( $M = 6.33$ ,  $SD = 4.62$ ) to March  
189 2021 ( $M = 8.00$ ,  $SD = 5.78$ ) and then decreased in June ( $M = 4.65$ ,  $SD = 4.33$ ) and slightly increased in

190 October 2021 ( $M = 5.03$ ,  $SD = 4.45$ ). Lastly, measurements of depression were somewhat similar. In  
191 October 2020, the mean BDI-II score was 8.85 ( $SD = 8.87$ ), then was increasing with the highest mean  
192 score in March 2021 ( $M = 7.97$ ,  $SD = 12.04$ ). Contrary to PSS-14 and GAD-7, the lowest mean score of  
193 BDI-II was measured in October 2021 ( $M = 7.21$ ,  $SD = 9.40$ ). More details are in the S6 Table. Alcohol  
194 intake, sleeping pills consumption and cigarette smoking are reported in S11 Table.

## 195 Exploratory analysis

196 To examine the relationship between sleep quality variables and chronotype, the repeated measures  
197 correlation was calculated (results in S8 Table). The increase in PSQI global score was significantly and  
198 weakly negatively correlated with the rMEQ score,  $r(144) = -.22$ ,  $p = .009$ . Meaning that worse sleep  
199 quality correlated with evening chronotype tendency. Next, bedtime was significantly moderately  
200 negatively correlated ( $r(144) = -.28$ ,  $p = .001$ ), and sleep time weakly significantly positively correlated ( $r$   
201  $(144) = .23$ ,  $p = .005$ ) with the rMEQ score. Wake-up time was not significantly correlated with the rMEQ  
202 score. This indicates that the morning chronotypes slept longer than the evening chronotype.

203 Further analysis of sleep quality, chronotype, and demographic variables using ANOVA (S9 Table)  
204 revealed that wake-up time and bedtime were significantly associated with chronotype, complementing  
205 the results of the correlation analysis above. However, the ANOVA revealed no statistically significant  
206 difference in sleep quality between chronotype categories, or in sleep time between chronotype  
207 categories. Sex differences were not apparent in any variable.

208 Repeated measures correlation analysis with cofactors revealed significant moderate positive  
209 association of sleep quality and perceived stress,  $r(130) = .27$ ,  $p = .002$ , and with symptoms of anxiety,  $r$   
210  $(128) = .20$ ,  $p = 0.02$ . Correlation with depressive symptoms was positive and large,  $r(122) = .38$ ,  $p <$   
211  $0.001$ . Interestingly, these associations were not present in June 2021. In chronotypes, no statistically  
212 significant correlations were found from October 2020 to March 2021. However, in June 2021, we found

213 significant large negative correlation with perceived stress,  $r = -.47$ ,  $p = 0.03$ , and borderline significant  
214 large negative correlation with symptoms of depression,  $r = -.037$ ,  $p = 0.09$ . In October 2021, there was  
215 borderline significant moderate negative correlation with perceived stress,  $r = -.29$ ,  $p = .09$ . Correlation  
216 with depressive symptoms was significant and large,  $r = -.48$ ,  $p = 0.005$ , and also with symptoms of  
217 anxiety,  $r = -.36$ ,  $p = 0.04$ . More details are in S8 Table.

218 Similar results were obtained through mixed ANOVA (S9 Table), where higher values of perceived stress,  
219 symptoms of depression and anxiety associated with worse sleep quality. This trend was present in  
220 majority of timepoints, except for June 2021 where all went statistically insignificant. No significant  
221 association was found with chronotype with exception of June and October 2021 where borderline  
222 significant association was found with perceived stress.

## 223 Change of sleep and chronotype over the time

224 To assess whether chronotype category and time predicted changes in sleep quality, we used LMM.  
225 Sleep quality was significantly predicted by time (see tab. 1). With increasing time, sleep quality  
226 improved. However, the opposite direction was found in the interaction between evening type and time  
227 (see also Fig. 4). Interaction between morning type and time was not statistically significant (more  
228 information in S10 Table)

229 *Table 1.: Results of the LMM model to test the effect of chronotype and time on sleep quality. Statistically significant predictors*  
230 *( $p < 0.05$ ) are shown in bold.*

| Variable      |              | Estimate | SE    | p-value |
|---------------|--------------|----------|-------|---------|
| Intercept     |              | 6.474    | 0.500 | <2e-16  |
| rMEQ category | Neutral type | ref.     | -     | -       |

It is made available under a [CC-BY 4.0 International license](https://creativecommons.org/licenses/by/4.0/) .

|                  |                     |               |              |              |
|------------------|---------------------|---------------|--------------|--------------|
|                  | Evening type        | -1.190        | 1.086        | 0.276        |
|                  | Morning type        | -0.280        | 0.782        | 0.722        |
| Time [months]    |                     | <b>-0.095</b> | <b>0.047</b> | <b>0.046</b> |
| Time x rMEQ cat. | Time x Neutral type | ref.          | -            | -            |
|                  | Time x Evening type | <b>0.243</b>  | <b>0.121</b> | <b>0.047</b> |
|                  | Time x Morning type | 0.020         | 0.078        | 0.803        |

231

232

233 *Figure 4.: Graphical representation of the estimated relationship between time and sleep quality (PSQI Global score) in morning*

234 *chronotype (green line), neutral chronotype (blue line), and evening chronotype (red line).*

235

## 236 Discussion

237 To our knowledge, this is the first study that assesses the sleep problems and chronotype longitudinally  
238 and non-retrospectively, encompassing three government-proclaimed stay-at-home lockdown periods  
239 (with a cumulative length of 100 days) and an equally long period of relaxation of restrictions. The  
240 studied sample was drawn from the population of university workers at RECETOX, MU (Czech Republic).  
241 We did not find significant general differences in sleep quality between chronotypes. However, we  
242 found that evening chronotypes had better sleep quality at the beginning of the study, which  
243 continuously worsened during all lockdown periods and subsequent 6 months of restriction relaxation in  
244 the evening chronotype. This result is in line with findings from Bazzani et al. [41], but contradict with  
245 others that did not find differences in the course of sleep quality in different chronotypes with  
246 chronotype and sleep quality changes [18,42,43]. Surprisingly, contrary to other studies [11–13,44–49],  
247 we found no sex differences in sleep quality. Our cohort has a small number of respondents who  
248 underwent or were suspected of SARS-CoV-2 infection (3.92 % and 15.69 % respectively). We can  
249 therefore assume that the results of this study may indicate the impact of pandemic measures rather  
250 than the consequences of possible COVID-19 infection or related treatment.

251 Our results extend the previous findings on the greater vulnerability of evening chronotype to sleep  
252 problems during the lockdown period [13,41,50] and in general [51–53]. This is somewhat contrary to  
253 expectations, because more relaxed working hours during stay-at-home orders may have benefitted  
254 evening types with prolonged wake-up time and more sleep, as observed by Staller and Randler [54]  
255 Hence, it could be hypothesized that the tendency for evening chronotype could emphasize sleep  
256 problems not only during stressful life periods but with possible long-lasting effects.

257 Another important finding was that the ratio of poor sleepers in the sample declined by 16.13 % at the  
258 end of the study. This finding is contrary to previous studies which found an increased prevalence of

259 sleep problems during lockdowns [11,13,47,48,55,56]. Based on their findings we would expect sleep  
260 problems to graduate during the lockdown and then mitigate through the relaxation of restrictions. The  
261 observed trend in our study may be caused by successful coping with the pandemic situation, or by  
262 individual differences in response to restrictive measures. Another explanation might be in the initial  
263 number of poor sleepers. Some studies reported [57,58] that individuals with present sleep problems  
264 may experience sleep improvement during the pandemic. Our sample had a higher ratio of poor  
265 sleepers than was found in several meta-analyses (prevalence in the general population was 27 % in  
266 Alimoradi et al. [12], 18% in Alimoradi et al. [11], 32.3 % in Jahrami et al. [59], 36.73 % in Jahrami et al.  
267 [60], but corresponds with a range of 17.65 – 81 % estimated by Lin et al. [8]). It may be that our  
268 participants with a higher prevalence of poor sleepers benefited from social and system changes during  
269 the pandemic by improving their sleep.

270 Another interesting associations were found in correlation analyses with potential cofactors, such as  
271 perceived stress, symptoms of depression and anxiety. During lock-down period, these cofactors were in  
272 statistically significant positive association with sleep quality but not with chronotype. However,  
273 different results were found in the period of restriction relaxation. In June 2021, there were no  
274 significant correlations with sleep quality, but significant large negative correlation between chronotype,  
275 depressive symptoms and perceived stress emerged. And in October 2021, the correlations were  
276 significant in all cofactors and for both sleep quality and chronotype. These chronotype specific changes  
277 are somewhat similar to findings from Salfi et al. [42] who in their longitudinal study found relationship  
278 between survey waves, evening chronotype and perceived stress, but not with symptoms of depression  
279 and anxiety. Such dynamics might be partially explained by seasonal effects [61–63]. Another possible  
280 explanation may be the psychosocial effect of COVID-19 related restriction policies changes. In our data,  
281 during the period of restriction relaxation, the symptoms of anxiety, depression and perception of stress  
282 decreased, while the mean sleep quality remained relatively stable. As a consequence, associations

283 between evening chronotype and higher tendency for stress perception and depressive symptoms were  
284 highlighted in the data. It is also possible that pandemic had longer lasting impact on evening  
285 chronotypes further increasing negative impact on their mood. Apart from that, this outcome challenges  
286 suggestions of some studies which found that sleep quality is a predictor of mental health [64] with  
287 evidence for bi-directional relationship [65,66]. Further research should investigate the bi-directional  
288 relationship between mood and sleep quality in longitudinal cohorts to address strength of the  
289 relationship with respect to the impact of major life or societal events, with specific focus on the  
290 vulnerability of evening chronotype.

291 This study is limited by the small sample which may have reduced the power of the study and did not  
292 allow the inclusion of more relevant variables in the model (e.g., symptoms of depression, anxiety, or  
293 perceived stress). Moreover, the number of individuals in chronotype categories decreased with time,  
294 most prominently in the evening chronotype category. In terms of the generalizability of the results, our  
295 cohort overrepresented academics and underrepresented administrative positions. Our study also did  
296 not include information on naptimes, use of soft drinks, medication and drugs, or data on the period  
297 before the pandemic and the first half year of the pandemic. Despite its limitations, the value of this  
298 study lies in the combination of longitudinal study design and a unique, unprecedented situation. Its  
299 results certainly add to our understanding of the long-lasting influence of pandemics and related  
300 restrictions on sleep quality in different chronotypes.

301 Results from our study provide evidence for higher vulnerability of evening chronotypes to the negative  
302 effects of pandemics on sleep quality and moods with long lasting effects. Future research should use  
303 larger sample, and include other symptoms interfering with sleep quality, e.g. depression, anxiety,  
304 perceived stress, etc. Furthermore, studies need to be carried out to determine effective  
305 countermeasures for these negative consequences of major psychosocial life events in evening  
306 chronotypes. These may include cognitive behavioral therapy for insomnia [67,68], digital therapeutics,

307 [67], or other recommendations (summarized in Altena et al. [68]). Findings from such studies may have  
308 important implications for developing prevention programs for the general public implemented by the  
309 government, public health professionals, and employers during possible future lockdowns. These  
310 programs may include educational projects on good sleep practices, and mental, emotional, and social  
311 health [67].

## 312 Acknowledgments

313 Authors would like to thank RECETOX MU for their support and to the individuals who participated in  
314 the study. We would also like to thank Tomáš Piskovský for assistance with the data analysis and David  
315 Konečný for proofreading the manuscript.



## 316 References

- 317 1. Nochaiwong S, Ruengorn C, Thavorn K, Hutton B, Awiphan R, Phosuya C, et al. Global prevalence of mental health  
318 issues among the general population during the coronavirus disease-2019 pandemic: a systematic review and meta-  
319 analysis. *Sci Rep [Internet]*. 2021 May 13;11(1):10173. Available from: <https://doi.org/10.1038/s41598-021-89700-8>
- 320 2. Salari N, Hosseini-Far A, Jalali R, Vaisi-Raygani A, Rasoulpoor S, Mohammadi M, et al. Prevalence of stress, anxiety,  
321 depression among the general population during the COVID-19 pandemic: a systematic review and meta-analysis.  
322 *Global Health [Internet]*. 2020;16(1):57. Available from: <https://doi.org/10.1186/s12992-020-00589-w>
- 323 3. Richter D, Riedel-Heller S, Zürcher SJ. Mental health problems in the general population during and after the first  
324 lockdown phase due to the SARS-Cov-2 pandemic: rapid review of multi-wave studies. *Epidemiol Psychiatr Sci*  
325 [Internet]. 2021/03/09. 2021 Mar 9;30:e27. Available from: [https://www.cambridge.org/core/article/mental-health-  
326 problems-in-the-general-population-during-and-after-the-first-lockdown-phase-due-to-the-sarscov2-pandemic-rapid-  
327 review-of-multiwave-studies/6186D1BEFB5515F92FF828CF84CAFB6D](https://www.cambridge.org/core/article/mental-health-problems-in-the-general-population-during-and-after-the-first-lockdown-phase-due-to-the-sarscov2-pandemic-rapid-review-of-multiwave-studies/6186D1BEFB5515F92FF828CF84CAFB6D)
- 328 4. Robinson E, Sutin AR, Daly M, Jones A. A systematic review and meta-analysis of longitudinal cohort studies comparing  
329 mental health before versus during the COVID-19 pandemic in 2020. *J Affect Disord [Internet]*. 2022;296:567–76.  
330 Available from: <https://www.sciencedirect.com/science/article/pii/S0165032721010570>
- 331 5. Dragioti E, Li H, Tsitsas G, Lee KH, Choi J, Kim J, et al. A large-scale meta-analytic atlas of mental health problems  
332 prevalence during the COVID-19 early pandemic. *J Med Virol [Internet]*. 2022 May 1;94(5):1935–49. Available from:  
333 <https://doi.org/10.1002/jmv.27549>
- 334 6. Zielinski MR, McKenna JT, McCarley RW. Functions and Mechanisms of Sleep. *AIMS Neurosci*. 2016;3(1):67–104.
- 335 7. Lo Martire V, Caruso D, Palagini L, Zoccoli G, Bastianini S. Stress & sleep: A relationship lasting a lifetime. *Neurosci*  
336 *Biobehav Rev [Internet]*. 2020;117:65–77. Available from:  
337 <https://www.sciencedirect.com/science/article/pii/S0149763419301496>
- 338 8. Lin YN, Liu ZR, Li SQ, Li CX, Zhang L, Li N, et al. Burden of Sleep Disturbance During COVID-19 Pandemic: A Systematic  
339 Review. *Nat Sci Sleep [Internet]*. 2021 Jun;Volume 13:933–66. Available from: [https://www.dovepress.com/burden-of-  
340 sleep-disturbance-during-covid-19-pandemic-a-systematic-revi-peer-reviewed-fulltext-article-NSS](https://www.dovepress.com/burden-of-sleep-disturbance-during-covid-19-pandemic-a-systematic-revi-peer-reviewed-fulltext-article-NSS)
- 341 9. Pilcher JJ, Dorsey LL, Galloway SM, Erikson DN. Social Isolation and Sleep: Manifestation During COVID-19 Quarantines.

- 342 Front Psychol [Internet]. 2022;12. Available from: <https://www.frontiersin.org/articles/10.3389/fpsyg.2021.810763>
- 343 10. Cipriani GE, Bartoli M, Amanzio M. Are Sleep Problems Related to Psychological Distress in Healthy Aging during the  
344 COVID-19 Pandemic? A Review. *Int J Environ Res Public Health*. 2021 Oct;18(20).
- 345 11. Alimoradi Z, Broström A, Tsang HWH, Griffiths MD, Haghayegh S, Ohayon MM, et al. Sleep problems during COVID-19  
346 pandemic and its' association to psychological distress: A systematic review and meta-analysis. *EclinicalMedicine*  
347 [Internet]. 2021 Jun;36:100916. Available from: <https://linkinghub.elsevier.com/retrieve/pii/S2589537021001966>
- 348 12. Alimoradi Z, Gozal D, Tsang HWH, Lin C, Broström A, Ohayon MM, et al. Gender-specific estimates of sleep problems  
349 during the COVID-19 pandemic: Systematic review and meta-analysis. *J Sleep Res* [Internet]. 2022 Feb 9;31(1).  
350 Available from: <https://onlinelibrary.wiley.com/doi/10.1111/jsr.13432>
- 351 13. Salfi F, Lauriola M, D'Atri A, Amicucci G, Viselli L, Tempesta D, et al. Demographic, psychological, chronobiological, and  
352 work-related predictors of sleep disturbances during the COVID-19 lockdown in Italy. *Sci Rep* [Internet]. 2021 Dec  
353 1;11(1):11416. Available from: <http://www.nature.com/articles/s41598-021-90993-y>
- 354 14. Robillard R, Dion K, Pennestri M, Solomonova E, Lee E, Saad M, et al. Profiles of sleep changes during the COVID-19  
355 pandemic: Demographic, behavioural and psychological factors. *J Sleep Res* [Internet]. 2021 Feb 17;30(1). Available  
356 from: <https://onlinelibrary.wiley.com/doi/10.1111/jsr.13231>
- 357 15. Zhang Y, Zhang H, Ma X, Di Q. Mental Health Problems during the COVID-19 Pandemics and the Mitigation Effects of  
358 Exercise: A Longitudinal Study of College Students in China. Vol. 17, *International Journal of Environmental Research*  
359 *and Public Health* . 2020.
- 360 16. Martínez-de-Quel Ó, Suárez-Iglesias D, López-Flores M, Pérez CA. Physical activity, dietary habits and sleep quality  
361 before and during COVID-19 lockdown: A longitudinal study. *Appetite* [Internet]. 2021;158:105019. Available from:  
362 <https://www.sciencedirect.com/science/article/pii/S019566632031641X>
- 363 17. Saraswathi I, Saikarthik J, Kumar KS, Srinivasan KM, Ardhanaari M, Gunapriya R. Impact of COVID-19 outbreak on the  
364 mental health status of undergraduate medical students in a COVID-19 treating medical college: a prospective  
365 longitudinal study. *PeerJ*. 2020;8:e10164.
- 366 18. Gao C, Scullin MK. Sleep health early in the coronavirus disease 2019 (COVID-19) outbreak in the United States:  
367 integrating longitudinal, cross-sectional, and retrospective recall data. *Sleep Med* [Internet]. 2020;73:1–10. Available

- 368 from: <https://www.sciencedirect.com/science/article/pii/S1389945720302999>
- 369 19. Ritchie H, Mathieu E, Rodés-Guirao L, Appel C, Giattino C, Ortiz-Ospina E, et al. Coronavirus Pandemic (COVID-19)  
370 [Internet]. Our World in Data. 2022. Available from: <https://ourworldindata.org/coronavirus>
- 371 20. Skočovský KD. Psychometrické vlastnosti české verze Dotazníku ranních a večerních typů (MEQ). Sociální procesy a  
372 osobnost Brno Psychol ústav FF MU v Brně. 2003;260–7.
- 373 21. Caci H, Deschaux O, Adan A, Natale V. Comparing three morningness scales: Age and gender effects, structure and cut-  
374 off criteria. *Sleep Med*. 2009;10(2):240–5.
- 375 22. Loureiro F, Garcia-Marques T. Morning or Evening person? Which type are you? Self-assessment of chronotype. *Pers*  
376 *Individ Dif* [Internet]. 2015;86:168–71. Available from: <http://dx.doi.org/10.1016/j.paid.2015.06.022>
- 377 23. Buysse DJ, Reynolds CF, Monk TH, Berman SR, Kupfer DJ. Buysse DJ, Reynolds CF, Monk TH, Berman SR, Kupfer DJ. The  
378 Pittsburgh Sleep Quality Index: a new instrument for psychiatric practice and research. *Psychiatry Res*. 1989;28:193–  
379 213. 1989;
- 380 24. Mollayeva T, Thurairajah P, Burton K, Mollayeva S, Shapiro CM, Colantonio A. The Pittsburgh sleep quality index as a  
381 screening tool for sleep dysfunction in clinical and non-clinical samples: A systematic review and meta-analysis. *Sleep*  
382 *Med Rev* [Internet]. 2016;25:52–73. Available from: <http://dx.doi.org/10.1016/j.smr.2015.01.009>
- 383 25. Buysse DJ, Reynolds CF 3rd, Monk TH, Berman SR, Kupfer DJ. The Pittsburgh Sleep Quality Index: a new instrument for  
384 psychiatric practice and research. *Psychiatry Res*. 1989 May;28(2):193–213.
- 385 26. Manková D, Dudysová D, Novák J, Fárková E, Janků K, Kliková M, et al. Reliability and Validity of the Czech Version of  
386 the Pittsburgh Sleep Quality Index in Patients with Sleep Disorders and Healthy Controls. *Biomed Res Int*. 2021;2021.
- 387 27. Cohen S, Kamarck T, Mermelstein R. A global measure of perceived stress. *J Health Soc Behav*. 1983;385–96.
- 388 28. Lee EH. Review of the Psychometric Evidence of the Perceived Stress Scale. *Asian Nurs Res (Korean Soc Nurs Sci)*  
389 [Internet]. 2012;6(4):121–7. Available from: <https://www.sciencedirect.com/science/article/pii/S1976131712000527>
- 390 29. Figalová N, Charvát M. The perceived stress scale: Reliability and validity study in the Czech Republic. *Cesk Psychol*  
391 [Internet]. 2021 Feb 28;65(1 SE-):46–59. Available from:  
392 <https://ceskoslovenskapsychologie.cz/index.php/csps/article/view/33>

- 393 30. Beck AT, Steer RA, Ball R, Ranieri WF. Comparison of Beck Depression Inventories-IA and-II in psychiatric outpatients. J  
394 Pers Assess. 1996;67(3):588–97.
- 395 31. Wang YP, Gorenstein C. Psychometric properties of the Beck Depression Inventory-II: a comprehensive review.  
396 Brazilian J Psychiatry. 2013;35:416–31.
- 397 32. Ociskova M, Prasko J, Kupka M, Marackova M, Latalova K, Cinculova A, et al. Psychometric evaluation of the Czech  
398 Beck Depression Inventory-II in a sample of depressed patients and healthy controls. Neuroendocr Lett. 2017;38(2):98–  
399 106.
- 400 33. Spitzer RL, Kroenke K, Williams JBW, Löwe B. A brief measure for assessing generalized anxiety disorder: the GAD-7.  
401 Arch Intern Med. 2006;166(10):1092–7.
- 402 34. Johnson SU, Ulvenes PG, Øktedalen T, Hoffart A. Psychometric properties of the general anxiety disorder 7-item (GAD-  
403 7) scale in a heterogeneous psychiatric sample. Front Psychol. 2019;10:1713.
- 404 35. Prikner O. Vybrané psychometrické charakteristiky škály GAD-7 [Internet]. Masaryk University; 2021. Available from:  
405 <https://is.muni.cz/th/imwek/>
- 406 36. R Core Team. R: A language and environment for statistical computing. Vienna, Austria: R Foundation for Statistical  
407 Computing; 2021.
- 408 37. Bakdash JZ, Marusich LR. rmcrr: Repeated Measures Correlation. R package version 0.4.6 [Internet]. 2022. Available  
409 from: <https://cran.r-project.org/package=rmcrr>
- 410 38. Kuznetsova A, Brockhoff PB, Christensen RHB. lmerTest Package: Tests in Linear Mixed Effects Models. J Stat Softw  
411 [Internet]. 2017;82(13):1–26. Available from: <http://www.jstatsoft.org/v82/i13/>
- 412 39. Pinheiro JC, Bates DM. Mixed-Effects Models in S and S-PLUS [Internet]. New York: Springer-Verlag; 2000. (Statistics  
413 and Computing). Available from: <http://link.springer.com/10.1007/b98882>
- 414 40. Gignac GE, Szodorai ET. Effect size guidelines for individual differences researchers. Pers Individ Dif [Internet].  
415 2016;102:74–8. Available from: <https://www.sciencedirect.com/science/article/pii/S0191886916308194>
- 416 41. Bazzani A, Bruno S, Frumento P, Cruz-Sanabria F, Turchetti G, Faraguna U. Sleep quality mediates the effect of  
417 chronotype on resilience in the time of COVID-19. Chronobiol Int [Internet]. 2021 Jun 3;38(6):883–92. Available from:

- 418 <https://www.tandfonline.com/doi/full/10.1080/07420528.2021.1895199>
- 419 42. Salfi F, Amicucci G, Corigliano D, Viselli L, D’Atri A, Tempesta D, et al. Two years after lockdown: Longitudinal  
420 trajectories of sleep disturbances and mental health over the <scp>COVID</scp> -19 pandemic, and the effects of age,  
421 gender and chronotype. *J Sleep Res* [Internet]. 2022 Nov; Available from:  
422 <https://onlinelibrary.wiley.com/doi/10.1111/jsr.13767>
- 423 43. Salehinejad MA, Majidinezhad M, Ghanavati E, Kouestanian S, Vicario CM, Nitsche MA, et al. Negative impact of  
424 COVID-19 pandemic on sleep quantitative parameters, quality, and circadian alignment: Implications for health and  
425 psychological well-being. *EXCLI J*. 2020;19:1297–308.
- 426 44. Beck F, Léger D, Fressard L, Peretti-Watel P, Verger P. Covid-19 health crisis and lockdown associated with high level of  
427 sleep complaints and hypnotic uptake at the population level. *J Sleep Res* [Internet]. 2021 Feb 28;30(1). Available from:  
428 <https://onlinelibrary.wiley.com/doi/10.1111/jsr.13119>
- 429 45. Mandelkorn U, Genzer S, Choshen-Hillel S, Reiter J, Meira e Cruz M, Hochner H, et al. Escalation of sleep disturbances  
430 amid the COVID-19 pandemic: a cross-sectional international study. *J Clin Sleep Med* [Internet]. 2021 Jan;17(1):45–53.  
431 Available from: <http://jcsm.aasm.org/doi/10.5664/jcsm.8800>
- 432 46. Pinto J, van Zeller M, Amorim P, Pimentel A, Dantas P, Eusébio E, et al. Sleep quality in times of Covid-19 pandemic.  
433 *Sleep Med* [Internet]. 2020 Oct;74:81–5. Available from:  
434 <https://linkinghub.elsevier.com/retrieve/pii/S1389945720303130>
- 435 47. Marelli S, Castelnuovo A, Somma A, Castronovo V, Mombelli S, Bottoni D, et al. Impact of COVID-19 lockdown on sleep  
436 quality in university students and administration staff. *J Neurol* [Internet]. 2021 Jan 11;268(1):8–15. Available from:  
437 <https://link.springer.com/10.1007/s00415-020-10056-6>
- 438 48. Casagrande M, Favieri F, Tambelli R, Forte G. The enemy who sealed the world: effects quarantine due to the COVID-19  
439 on sleep quality, anxiety, and psychological distress in the Italian population. *Sleep Med* [Internet]. 2020 Nov;75:12–  
440 20. Available from: <https://linkinghub.elsevier.com/retrieve/pii/S1389945720302136>
- 441 49. Cellini N, Conte F, De Rosa O, Giganti F, Malloggi S, Rey M, et al. Changes in sleep timing and subjective sleep quality  
442 during the COVID-19 lockdown in Italy and Belgium: age, gender and working status as modulating factors. *Sleep Med*  
443 [Internet]. 2021;77:112–9. Available from: <https://www.sciencedirect.com/science/article/pii/S138994572030527X>

- 444 50. Bessot N, Langeard A, Dosseville F, Quarck G, Freret T. Chronotype influence on the effects of <scp>COVID</scp> -19  
445 lockdown on sleep and psychological status in France. *J Sleep Res* [Internet]. 2023 Feb 20; Available from:  
446 <https://onlinelibrary.wiley.com/doi/10.1111/jsr.13864>
- 447 51. Fabbian F, Zucchi B, De Giorgi A, Tiseo R, Boari B, Salmi R, et al. Chronotype, gender and general health. *Chronobiol Int*  
448 [Internet]. 2016 Aug 8;33(7):863–82. Available from:  
449 <https://www.tandfonline.com/doi/full/10.1080/07420528.2016.1176927>
- 450 52. Rique GLN, Fernandes Filho GMC, Ferreira ADC, de Sousa-Muñoz RL. Relationship between chronotype and quality of  
451 sleep in medical students at the Federal University of Paraiba, Brazil. *Sleep Sci* [Internet]. 2014 Jun;7(2):96–102.  
452 Available from: <http://linkinghub.elsevier.com/retrieve/pii/S1984006314000315>
- 453 53. Merikanto I, Kronholm E, Peltonen M, Laatikainen T, Lahti T, Partonen T. Relation of Chronotype to Sleep Complaints in  
454 the General Finnish Population. *Chronobiol Int* [Internet]. 2012 Apr 6;29(3):311–7. Available from:  
455 <http://www.tandfonline.com/doi/full/10.3109/07420528.2012.655870>
- 456 54. Staller N, Randler C. Changes in sleep schedule and chronotype due to COVID-19 restrictions and home office.  
457 *Somnologie Schlafforsch und Schlafmedizin = Somnology sleep Res sleep Med*. 2021;25(2):131–7.
- 458 55. Salfi F, Lauriola M, Amicucci G, Corigliano D, Viselli L, Tempesta D, et al. Gender-related time course of sleep  
459 disturbances and psychological symptoms during the COVID-19 lockdown: A longitudinal study on the Italian  
460 population. *Neurobiol Stress* [Internet]. 2020 Nov;13:100259. Available from:  
461 <https://linkinghub.elsevier.com/retrieve/pii/S2352289520300497>
- 462 56. Neculicioiu VS, Colosi IA, Costache C, Sevastre-Berghian A, Clichici S. Time to Sleep?&mdash;A Review of the Impact of  
463 the COVID-19 Pandemic on Sleep and Mental Health. Vol. 19, *International Journal of Environmental Research and*  
464 *Public Health*. 2022.
- 465 57. Kocevskaja D, Blanken TF, Van Someren EJW, Rösler L. Sleep quality during the COVID-19 pandemic: not one size fits all.  
466 *Sleep Med* [Internet]. 2020 Dec;76:86–8. Available from:  
467 <https://linkinghub.elsevier.com/retrieve/pii/S1389945720304408>
- 468 58. Meaklim H, Junge MF, Varma P, Finck WA, Jackson ML. Pre-existing and post-pandemic insomnia symptoms are  
469 associated with high levels of stress, anxiety, and depression globally during the COVID-19 pandemic. *J Clin Sleep Med*  
470 [Internet]. 2021 Oct;17(10):2085–97. Available from: <http://jcsn.aasm.org/doi/10.5664/jcsn.9354>

- 471 59. Jahrami H, BaHammam AS, Bragazzi NL, Saif Z, Faris M, Vitiello M V. Sleep problems during the COVID-19 pandemic by  
472 population: a systematic review and meta-analysis. *J Clin Sleep Med* [Internet]. 2021 Feb;17(2):299–313. Available  
473 from: <http://jcsm.aasm.org/doi/10.5664/jcsm.8930>
- 474 60. Jahrami HA, Alhaj OA, Humood AM, Alenzi AF, Fekih-Romdhane F, AlRasheed MM, et al. Sleep disturbances during  
475 the COVID-19 pandemic: A systematic review, meta-analysis, and meta-regression. *Sleep Med Rev* [Internet]. 2022  
476 Apr;62:101591. Available from: <https://linkinghub.elsevier.com/retrieve/pii/S1087079222000041>
- 477 61. Madden PAF, Heath AC, Rosenthal NE, Martin NG. Seasonal changes in mood and behavior: the role of genetic factors.  
478 *Arch Gen Psychiatry*. 1996;53(1):47–55.
- 479 62. Harmatz MG, Well AD, Overtree CE, Kawamura KY, Rosal M, Ockene IS. Seasonal variation of depression and other  
480 moods: a longitudinal approach. *J Biol Rhythms*. 2000;15(4):344–50.
- 481 63. Winthorst WH, Bos EH, Roest AM, de Jonge P. Seasonality of mood and affect in a large general population sample.  
482 *PLoS One* [Internet]. 2020 Sep 14;15(9):e0239033. Available from: <https://doi.org/10.1371/journal.pone.0239033>
- 483 64. João KADR, Jesus SN de, Carmo C, Pinto P. The impact of sleep quality on the mental health of a non-clinical  
484 population. *Sleep Med* [Internet]. 2018 Jun;46:69–73. Available from:  
485 <https://www.sciencedirect.com/science/article/pii/S1389945718300698>
- 486 65. Alvaro PK, Roberts RM, Harris JK. A Systematic Review Assessing Bidirectionality between Sleep Disturbances, Anxiety,  
487 and Depression. *Sleep* [Internet]. 2013 Jul 1;36(7):1059–68. Available from: <https://doi.org/10.5665/sleep.2810>
- 488 66. Afonso P, Fonseca M, Teodoro T. Evaluation of anxiety, depression and sleep quality in full-time teleworkers. *J Public*  
489 *Health (Bangkok)* [Internet]. 2022 Dec 1;44(4):797–804. Available from: <https://doi.org/10.1093/pubmed/fdab164>
- 490 67. O’Regan D, Jackson ML, Young AH, Rosenzweig I. Understanding the Impact of the COVID-19 Pandemic, Lockdowns  
491 and Social Isolation on Sleep Quality. *Nat Sci Sleep*. 2021;13:2053–64.
- 492 68. Altena E, Baglioni C, Espie CA, Ellis J, Gavriloff D, Holzinger B, et al. Dealing with sleep problems during home  
493 confinement due to the COVID-19 outbreak: Practical recommendations from a task force of the European CBT-I  
494 Academy. *J Sleep Res* [Internet]. 2020 Aug 4;29(4). Available from:  
495 <https://onlinelibrary.wiley.com/doi/10.1111/jsr.13052>

## 496 Supporting Information

497 **S1 Table. Characteristics of the studied population and study sample.**

498 **S2 Table. Demographic parameters of the study sample.**

499 **S3 Table. Response rates for questionnaires in individual time points.**

500 **S4 Table. Demographic parameters and sleep problems in complete and incomplete cases.**

501 **S5 Table. Distribution of sleep quality and chronotype in different timepoints, sex and age groups.**

502 **S6 Table. Descriptive statistics of perceived stress, symptoms of anxiety and depression in different**  
503 **timepoints.**

504 **S7 Table. COVID-19 status of the studied population.**

505 **S8 Table. Repeated measures correlation.** Statistically significant results are in bold.

506 **S9 Table. ANOVA.** Statistically significant results are in bold.

507 **S10 Table. Linear mixed model fit by REML.** t-tests use Satterthwaite's method.

508 **S11 Table. Alcohol intake, sleeping pills consumption, and cigarette smoking.**

509



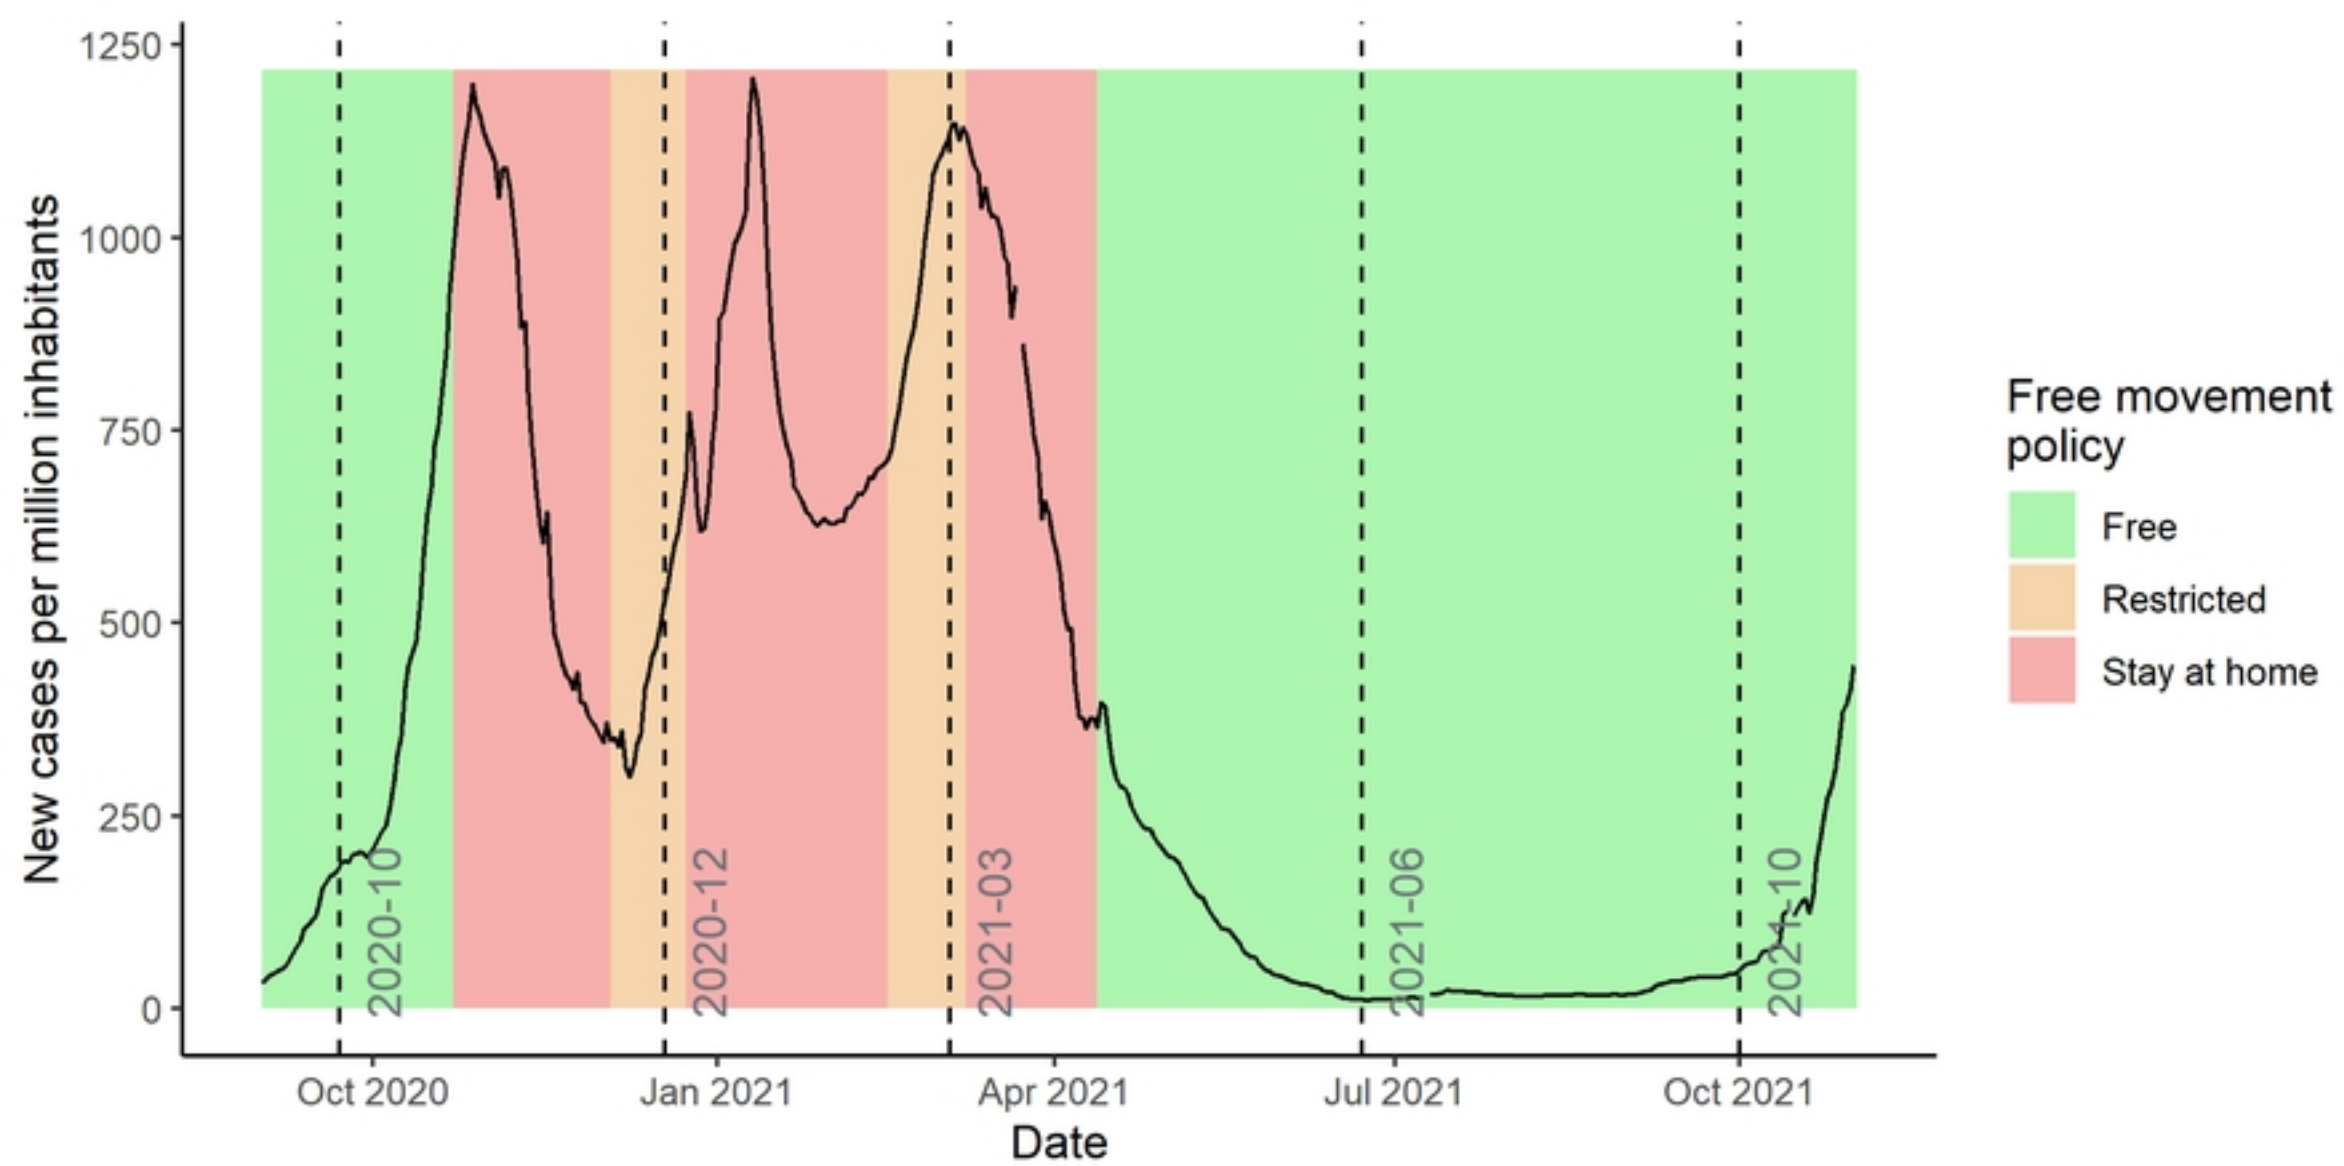

Figure 1

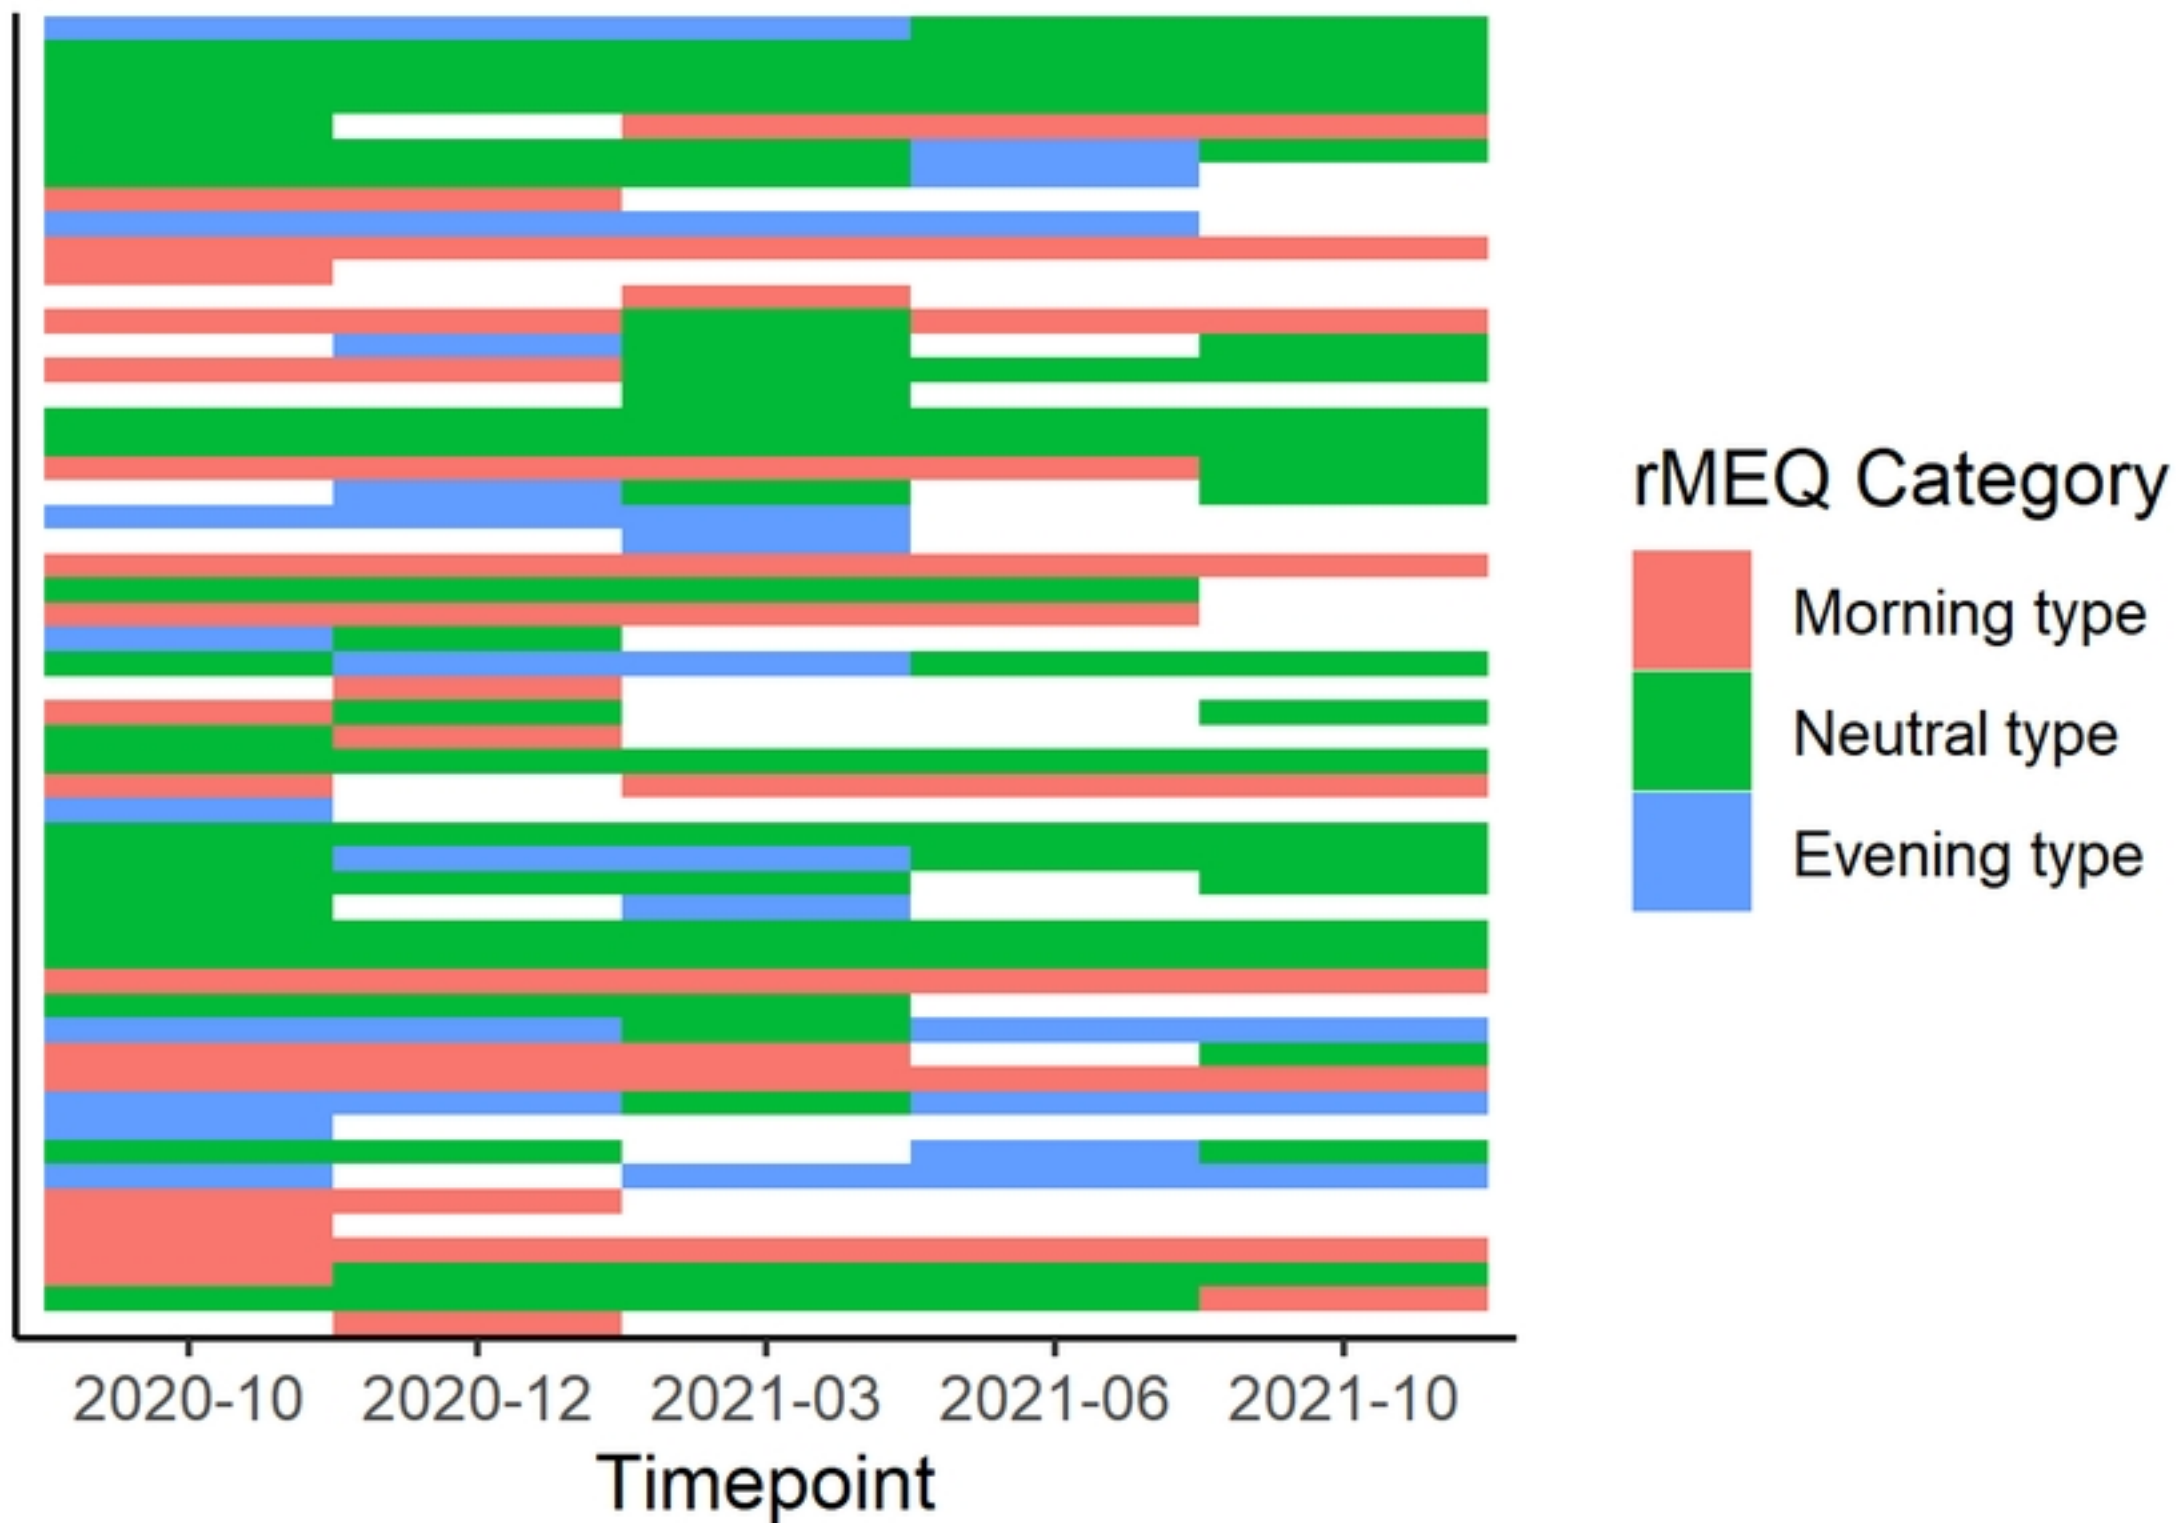

Figure 2

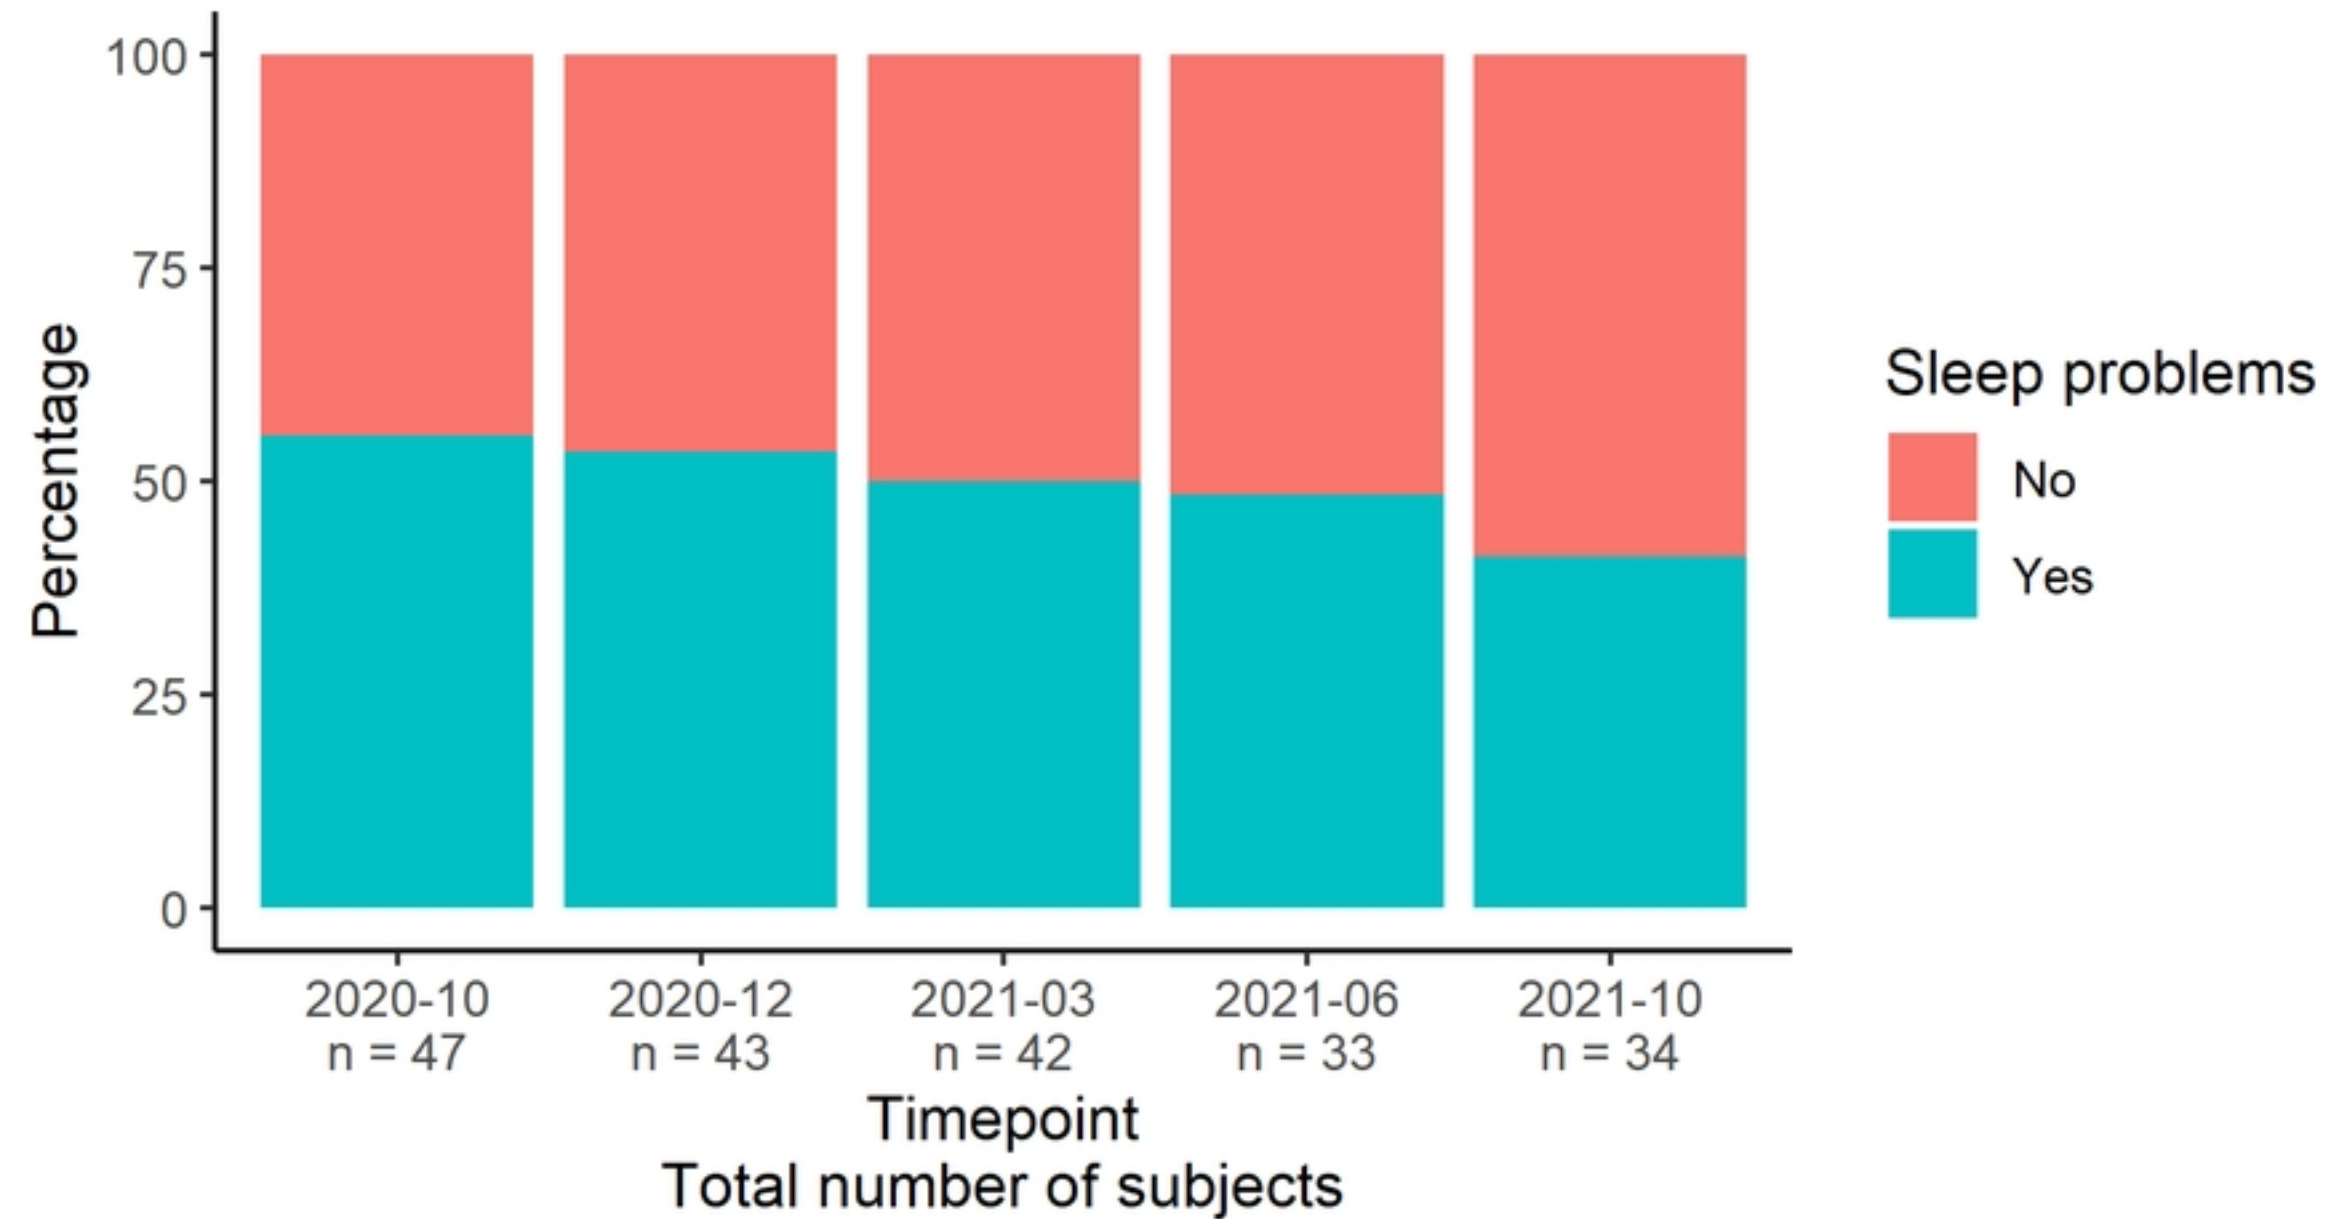

Figure 3

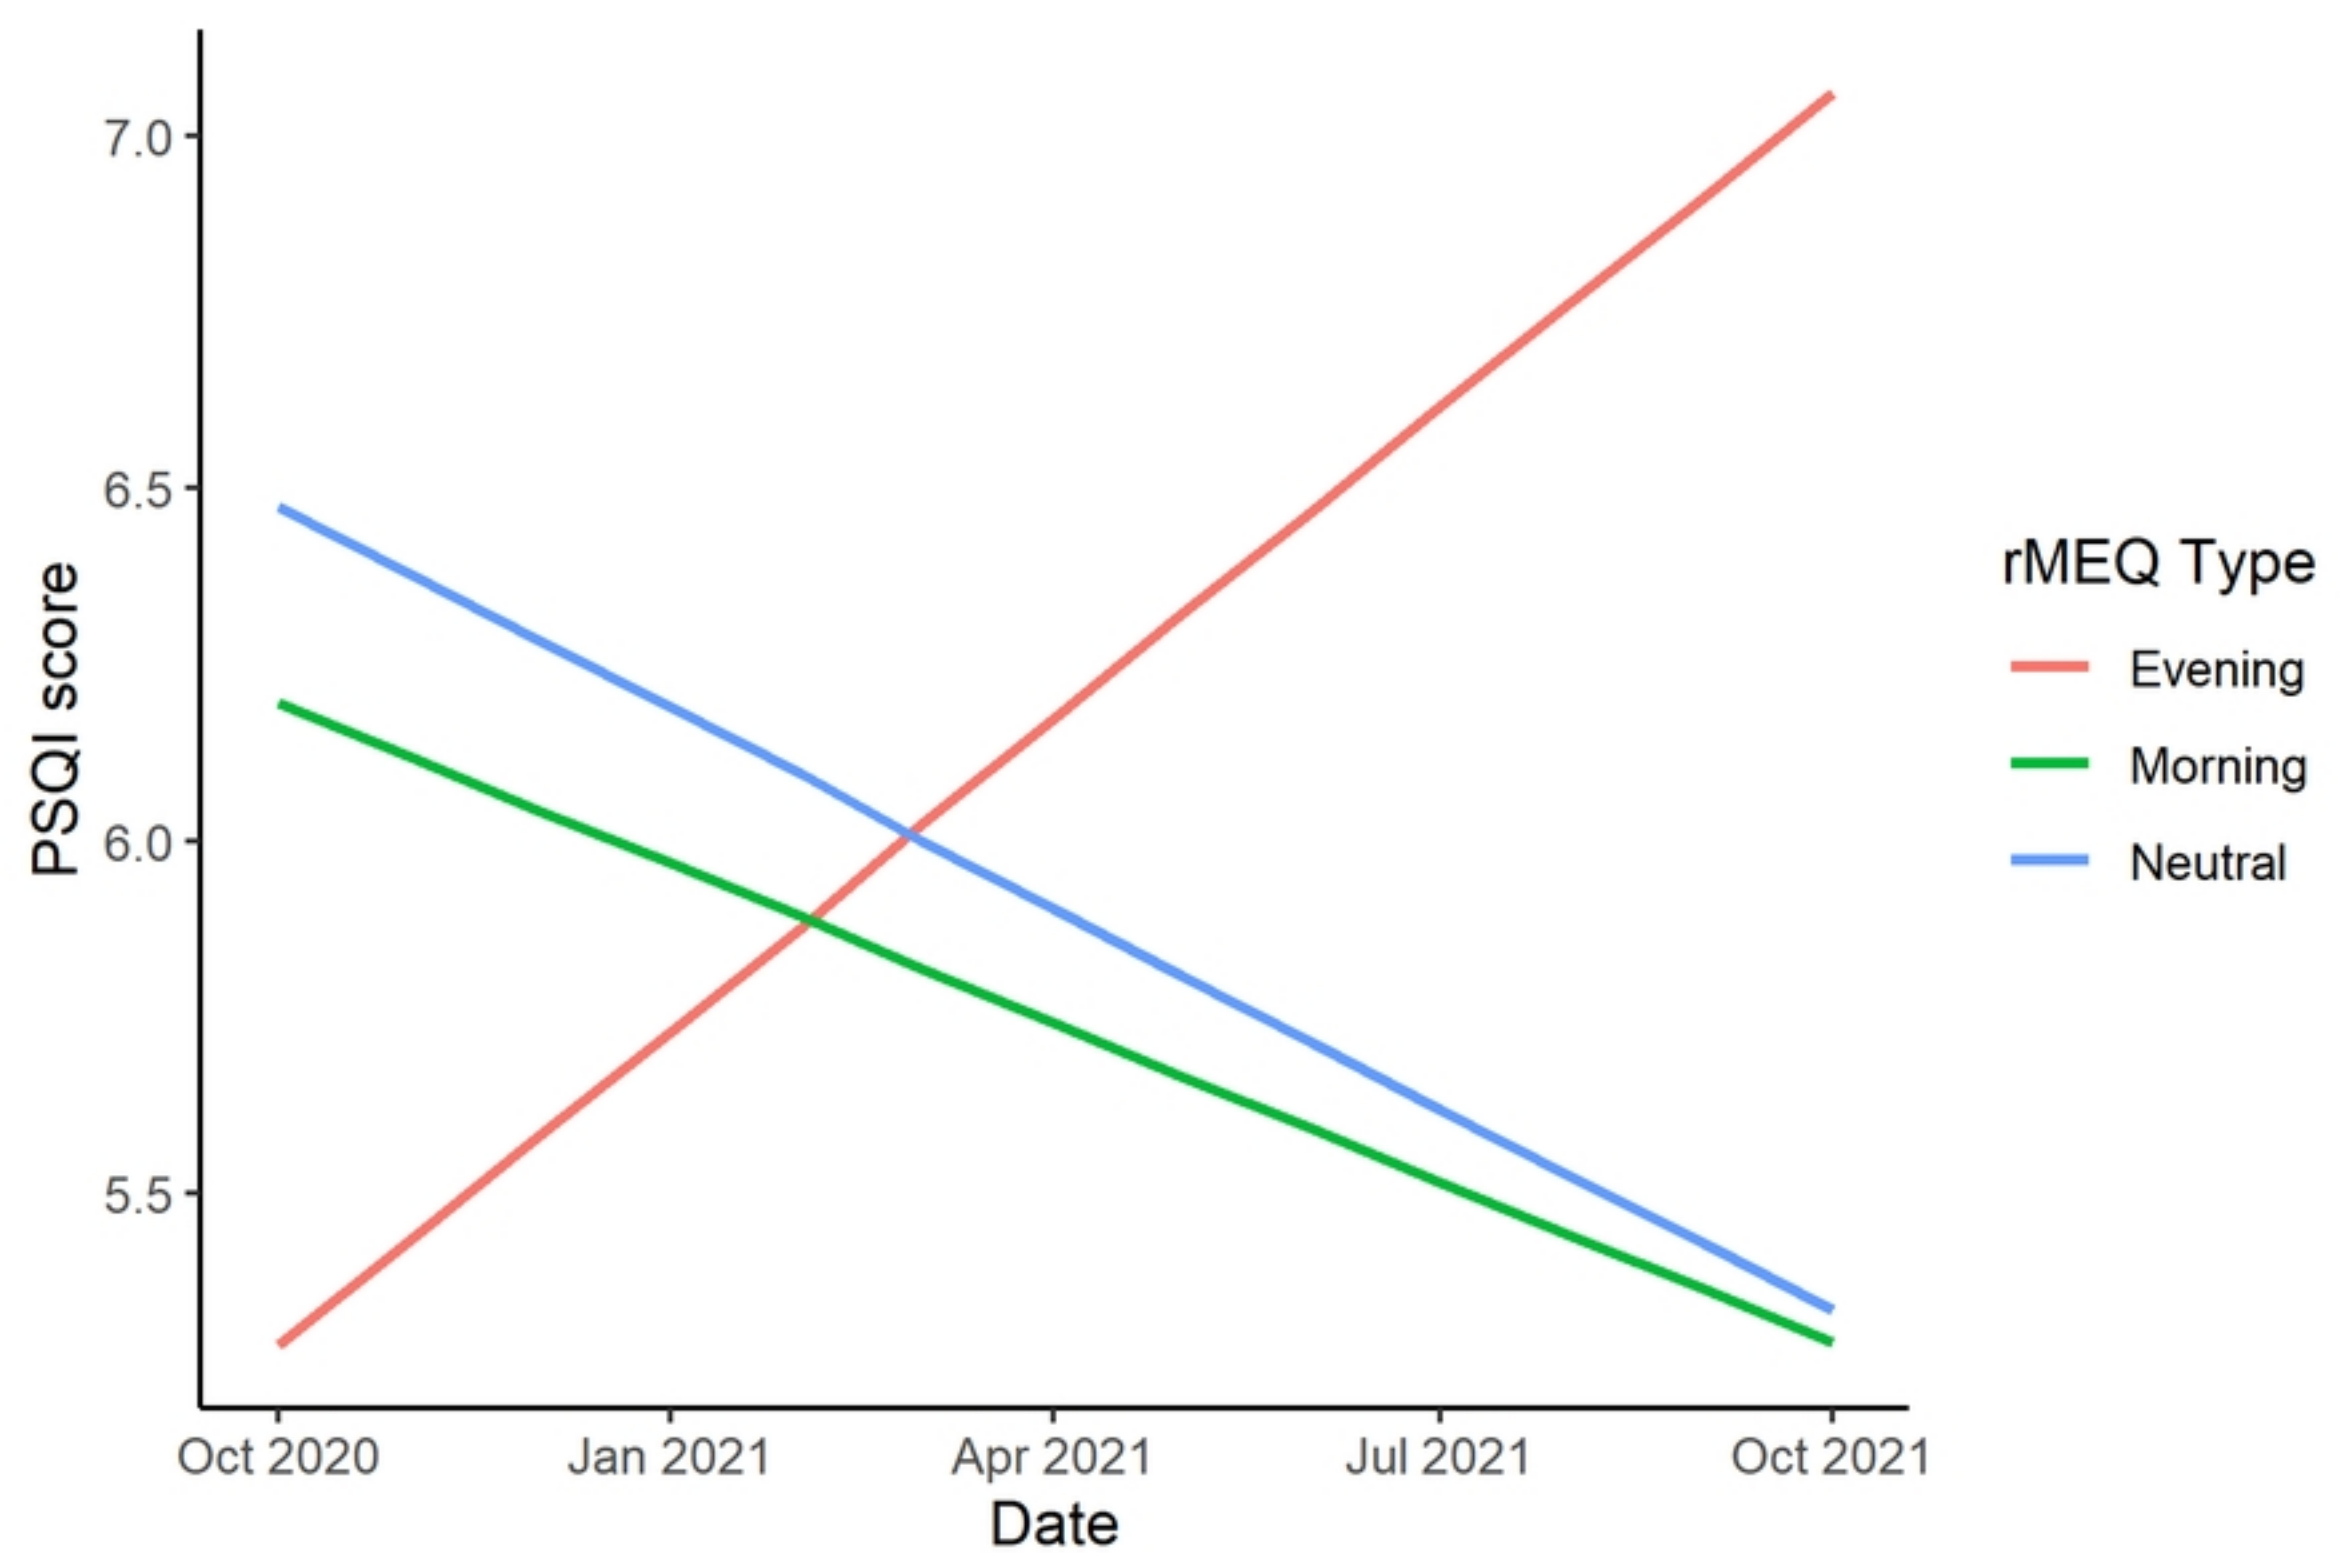

Figure 4
